# Supplementary material for: The homeoprotein DLX4 controls inducible nitric oxide synthase-mediated angiogenesis in ovarian cancer
Source: PubMed Central journal article supplement (PMC4427985; doi:10.1186/s12943-015-0368-3), 2015-04-30

## **SUPPLEMENTAL FIGURE LEGENDS**

**Supplemental Figure S1. Knockdown of DLX4 decreases iNOS levels in ovarian tumor cells.** Flow cytometric analysis of intracellular staining of DLX4 and iNOS in (A) OVCAR8, (B) OVCA429 and (C) TOV112D cells, where cells of these lines were transfected with non-targeting shRNA and shRNAs that targeted two different regions of *DLX4* (shDLX4-A, shDLX4-B). Mean fluorescence intensities (MFI) of staining are indicated.

**Supplemental Figure S2. DLX4 stimulates STAT1-driven promoter activity.** OVCAR8 and TOV112D cells that expressed non-targeting and *DLX4* shRNAs were transfected with the GAS-LUC reporter construct, stimulated without or with IFN- $\gamma$  (10 ng/mL) for 16 h and then assayed for luciferase activity. Shown are relative firefly luciferase activities in three independent experiments.

**Supplemental Figure S3. Effect of DLX4 on STAT1 localization in ovarian tumor cells.** Immunofluorescence staining of STAT1 (shown in red) in vector-control and +DLX4 ES2 cells that were stimulated with IFN- $\gamma$  (10 ng/mL) for 1 h or left unstimulated. Cells were also stained with DAPI (shown in blue) to visualize nuclei. Bar, 20  $\mu$ m.

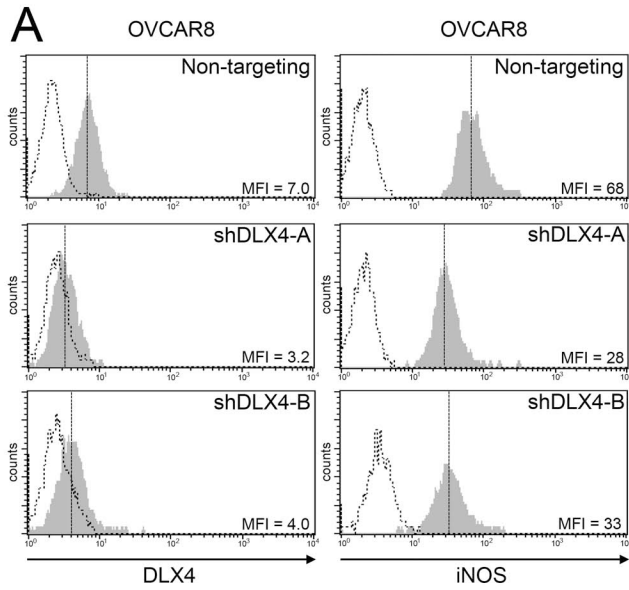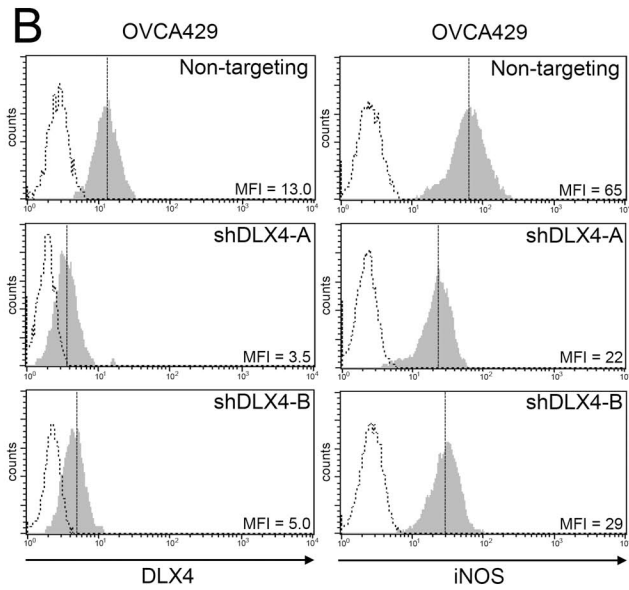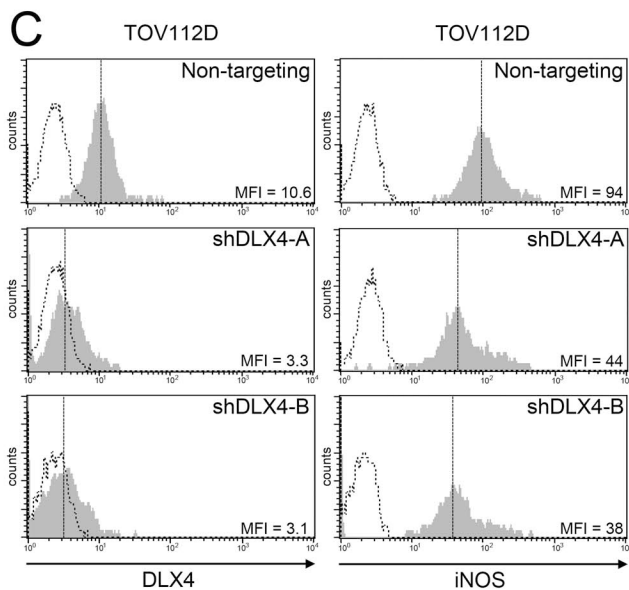

Supplemental Figure S2

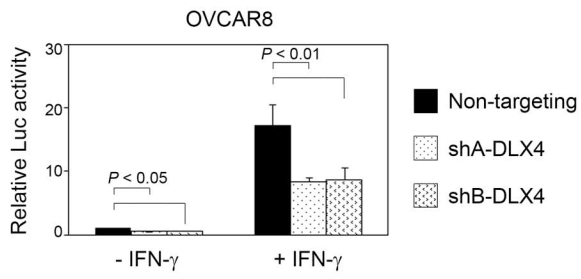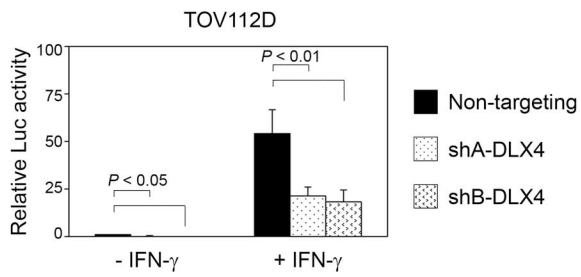

Supplemental Figure S3

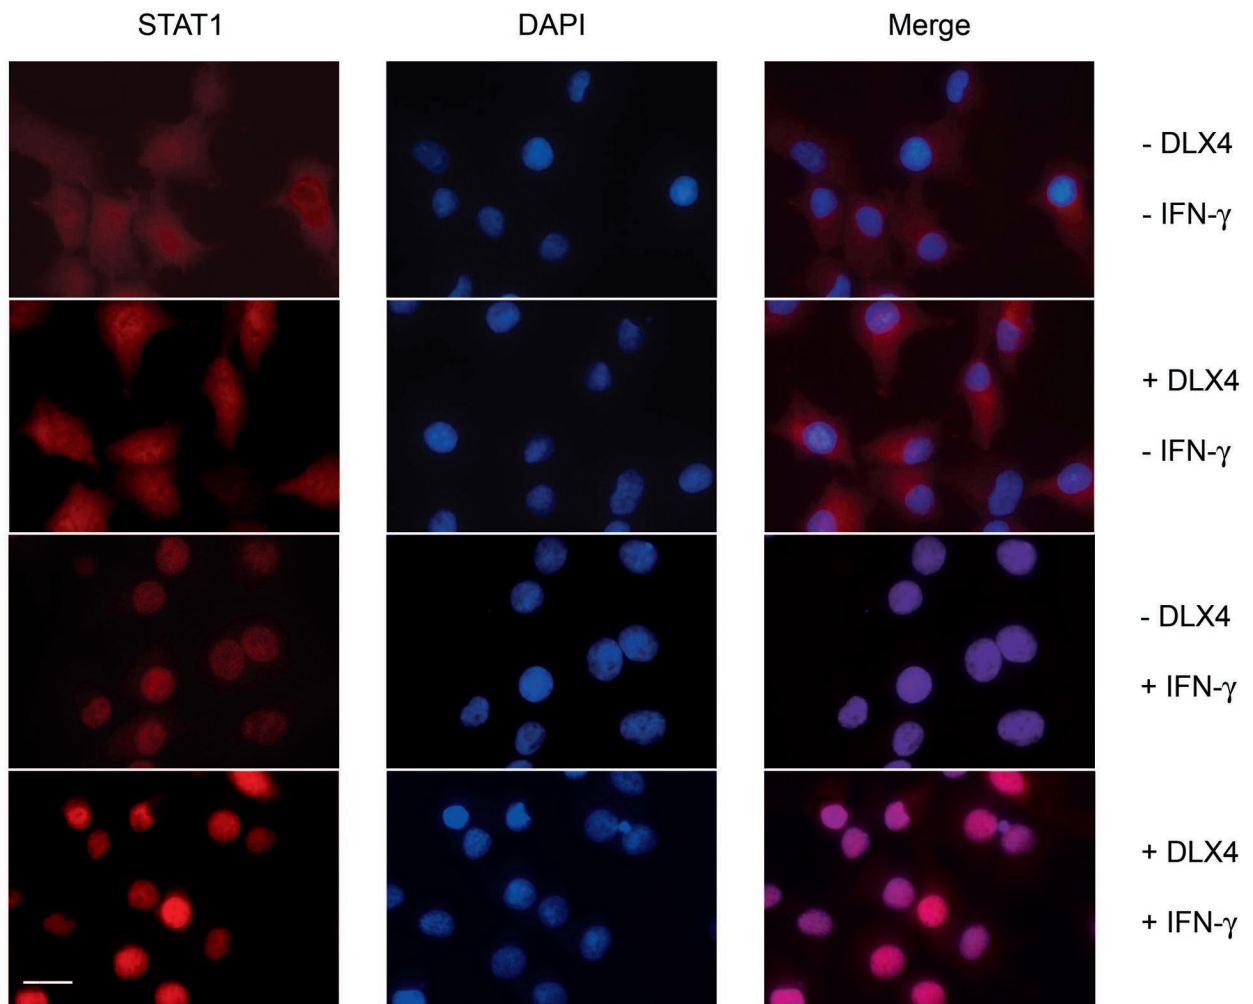

Supplement: 12943_2015_368_MOESM1_ESM.pdf [file 12943_2015_368_MOESM1_ESM.pdf]
